# Supplementary material for: Increased Brain-Specific MiR-9 and MiR-124 in the Serum Exosomes of Acute Ischemic Stroke Patients
Source: PLoS One. 2016 Sep 23;11(9):e0163645. doi: 10.1371/journal.pone.0163645 (PMC5035015; doi:10.1371/journal.pone.0163645)
Supplement: S1 Table — (XLS) [file pone.0163645.s002.xls]

## Sheet: 工作表1
sex		age		hypertension		Diabetes		Atrial Fibrillation		Hyperlipidemia		Coronary heart disease		MRI infract volume		NIHSS scores		IL-6		miR9		miR-124		miR-451
stroke	control	stroke	control	stroke	control	stroke	control	stroke	control	stroke	control	stroke	control	Stroke	control	Stroke		stroke	control	Stroke	Control	stroke	control	Stroke	Control
1	1	52	54	1	1	1	1	1	1	1	1	1	1	68.9		18		5.97		28.27	32.39	25.71	32.65	23.18	22.46
1	1	64	61	1	1	1	1	1	1	1	1	1	1	19.53		9		4.82		25.95	33.03	29.07	30.32	24.24	25.38
1	1	72	51	1	1	1	1	1	1	1	1	1	1	53		16		5.11		29.25	31.96	26.74	33.56	24.59	24.27
1	1	75	58	1	1	1	1	1	1	1	1	1	1	36.58		13		5.69		28.52	32.01	30.04	32.83	23.87	24.1
1	1	63	53	1	1	1	1	1	1	1	1	0	0	67.17		16		4.78		25.27	36.19	29.31	29	24.88	24.76
1	1	51	64	1	1	1	1	1	1	1	1	0	0	16		11		4.05		25.27	32.09	25.95	29	24.76	24.4
1	1	57	79	1	1	1	1	1	1	1	1	0	0	53.95		12		4.9		28.95	32.23	25.95	32.53	24.94	24.29
1	1	62	58	1	1	1	1	1	1	1	1	0	0	16.6		11		3.61		28.52	32.39	29.6	32.09	24.76	24.25
1	1	46	63	1	1	1	1	1	0	1	1	0	0	16.85		11		3.63		25.17	32.46	29.17	28.21	24.66	24.8
1	1	68	51	1	1	1	1	1	0	1	1	0	0	39.45		11		5.43		28.72	32.47	29.26	31.77	23.78	24.8
1	1	65	53	1	1	1	1	1	0	1	1	0	0	41.23		12		2.17		29.25	32.68	29.69	32.8	24.39	24.43
1	1	40	66	1	1	1	1	1	0	1	1	0	0	53.22		15		3.16		29.21	32.84	29.65	31.76	26.11	24.44
1	1	73	60	1	1	1	0	1	0	1	1	0	0	38.66		12		3.88		31.8	33.61	32.7	36.63	24.74	22.88
1	1	71	52	1	1	1	0	1	0	1	1	0	0	43.55		13		3.97		28.72	34.22	29.15	31.19	24.88	25.8
1	1	58	67	1	1	1	0	0	0	1	1	0	0	55.1		14		3.91		29.21	34.27	29.59	31.36	24.6	24.7
1	1	69	53	1	1	1	0	0	0	1	1	0	0	56.65		15		3.21		30.7	34.66	31.08	32.85	24.21	24.52
1	1	63	51	1	1	1	0	0	0	1	0	0	0	5.53		10		3.73		29.25	35.56	29.59	31.2	24.21	25.23
1	1	68	55	1	1	1	0	0	0	1	0	0	0	26.89		7		2.36		28.52	36.77	28.87	30.47	25.43	24.87
1	1	60	52	1	1	0	0	0	0	0	0	0	0	33.83		12		3.61		31.57	37	31.91	33.4	24.76	24.47
1	1	53	56	1	1	0	0	0	0	0	0	0	0	38.85		10		3.63		31.67	37.94	32.01	33.5	24.42	24.4
1	1	72	52	1	1	0	0	0	0	0	0	0	0	11.75		6		3.41		33.92	38.38	34.26	36	24.33	24.83
1	1	64	60	1	1	0	0	0	0	0	0	0	0	18.23		10		1.89		33.92	38.8	34.26	35.96	23.95	26.52
1	1	68	65	1	1	0	0	0	0	0	0	0	0	21.26		6		3.38		31.57	33.92	31.91	33.59	24.84	24.46
1	1	46	75	1	1	0	0	0	0	0	0	0	0	23.39		9		5.69		31.9	33.92	32.23	33.92	23.87	24.44
1	1	51	71	1	1	0	0	0	0	0	0	0	0	35		12		4.11		28.95	32.16	29.29	30.97	24.45	22.88
1	1	70	62	1	1	0	0	0	0	0	0	0	0	6.12		6		4.02		31.67	32.5	32.01	33.69	24.16	25.81
1	1	70	61	1	1	0	0	0	0	0	0	0	0	11.39		8		3.46		28.27	32.71	28.6	31.25	24.49	25.69
1	1	72	70	1	1	0	0	0	0	0	0	0	0	19.9		5		4.41		28.71	32.48	29.04	30.68	24.45	24.58
1	1	38	64	1	1	0	0	0	0	0	0	0	0	20.12		8		4.39		30.75	31.96	31	32.35	22.5	24.15
1	1	48	66	1	1	0	0	0	0	0	0	0	0	21		6		3.84		30.79	32.01	31.04	32.39	24.05	24.88
1	1	58	46	1	1	0	0	0	0	0	0	0	0	22.23		8		3.57		32.48	32.16	32.71	33.99	24.4	24.52
1	1	76	62	1	1	0	0	0	0	0	0	0	0	25		8		3.99		34.74	33.03	34.97	36.24	24.06	24.13
1	1	53	55	1	1	0	0	0	0	0	0	0	0	28.56		8		3.97		32.48	31.19	32.59	33.38	25.19	24.06
1	1	63	51	1	1	0	0	0	0	0	0	0	0	29.29		5		3.71		32.35	35.61	32.46	33.18	22.84	25.02
1	1	72	56	1	1	0	0	0	0	0	0	0	0	31.67		8		3.63		35.61	34.7	36.04	38	24.42	26.16
1	1	74	53	1	0	0	0	0	0	0	0	0	0	6.17		9		3.27		35	36.6	35.24	30.79	25.77	24.31
1	0	62	61	1	0	0	0	0	0	0	0	0	0	7.08		7		4.52		29.29	32.63	27.89	31.98	25.45	24.65
1	0	60	65	1	0	0	0	0	0	0	0	0	0	12.27		9		3.83		34.27	36.15	26.65	29.78	22.85	22.78
1	0	58	75	1	0	0	0	0	0	0	0	0	0	15.31		9		3.21		26.38	33.11	29.6	32.55	25.29	23.68
1	0	61	69	1	0	0	0	0	0	0	0	0	0	21.95		7		2.23		28.67	31.15	28.3	31.99	24.53	25.17
0	0	48	63	1	0	0	0	0	0	0	0	0	0	27.05		6		3.95		27.61	36.92	34.16	34.14	23.48	24.2
0	0	67	60	1	0	0	0	0	0	0	0	0	0	5.02		3		3.17		31.53	32.02	32.36	32.61	23.11	24.68
0	0	66	69	1	0	0	0	0	0	0	0	0	0	5.13		5		3.39		34.31	33.12	31.55	34.76	24.97	25.11
0	0	41	65	0	0	0	0	0	0	0	0	0	0	6.18		6		3.16		35.53	37.2	28.2	36.46	24.02	23.73
0	0	72	67	0	0	0	0	0	0	0	0	0	0	9.7		6		3.77		25.61	33.7	33.42	33.11	25.61	25.35
0	0	70	47	0	0	0	0	0	0	0	0	0	0	12.82		7		3.23		26.07	32.98	29.45	29.6	25.6	25.3
0	0	59	62	0	0	0	0	0	0	0	0	0	0	13.71		9		2.58		27.79	34.89	25.73	35.62	23	25.48
0	0	68	72	0	0	0	0	0	0	0	0	0	0	15.21		8		3.67		27.2	32.69	35.89	36.48	25.01	23.78
0	0	64	55	0	0	0	0	0	0	0	0	0	0	18.58		5		3.65		26.41	32.79	27.26	34.53	25.9	23.26
0	0	63	63	0	0	0	0	0	0	0	0	0	0	20.32		3		2.98		33.84	32.29	31.03	30.84	22.94	24.67
0	0	60	50	0	0	0	0	0	0	0	0	0	0	21.13		4		3.05		34.26	33.27	35.09	34.7	25.49	23.79
0	0	53	53	0	0	0	0	0	0	0	0	0	0	5.23		6		3.45		25.42	35.78	26.13	29.29	24.36	26.2
0	0	72	64	0	0	0	0	0	0	0	0	0	0	7.45		5		1.89		26.45	32.89	35.57	32.31	25.84	26.22
0	0	66	60	0	0	0	0	0	0	0	0	0	0	8.76		4		1.75		28.01	37.16	32.5	33.72	24.25	22.65
0	0	69	53	0	0	0	0	0	0	0	0	0	0	10.53		5		2.29		33.09	35.77	27.16	29.66	24.26	23.79
0	0	45	67	0	0	0	0	0	0	0	0	0	0	13.97		7		2.17		32.26	33.26	26.13	33.83	23.99	25.69
0	0	62	52	0	0	0	0	0	0	0	0	0	0	19.52		4		2.82		35.39	31.92	25.72	32.55	23.1	23.93
0	0	69	51	0	0	0	0	0	0	0	0	0	0	5.62		6		3.55		33.69	34.34	35.8	31.79	25.44	24.47
0	0	71	73	0	0	0	0	0	0	0	0	0	0	6.5		7		3.53		26.22	32.42	35.17	30.29	25.95	24.78
0	0	70	53	0	0	0	0	0	0	0	0	0	0	8.16		8		1.02		26.35	31.47	30.07	33.99	22.66	22.64
0	0	61	62	0	0	0	0	0	0	0	0	0	0	9.88		4		0.85		28.37	32.32	35.98	36.33	25.12	23.2
0	0	60	49	0	0	0	0	0	0	0	0	0	0	9.98		10		0.12		25.26	33.19	33.21	32.58	23.57	25.94
0	0	59	58	0	0	0	0	0	0	0	0	0	0	14.39		5		1.13		34.26	31.81	34.95	33.72	24.63	26.04
0	0	76	59	0	0	0	0	0	0	0	0	0	0	6.21		6		3.62		36.7	30.99	25.9	29.79	23.61	24.65
0	0	67	63	0	0	0	0	0	0	0	0	0	0	8.63		6		1.26		35.33	33.7	27.4	30.92	23.86	26.31
	0		70		0		0		0		0		0								38.82		32.3		23.53
